# Supplementary material for: Multicollinearity and misleading statistical results
Source: PubMed Central journal article supplement — Korean J Anesthesiol. 2019 Jul 15;72(6):558–69. doi: 10.4097/kja.19087 (PMC6900425; doi:10.4097/kja.19087), 2019-07-15
Supplement: kja-19087-app.pdf [file kja-19087-app.pdf]

## Appendix

This appendix shows the mathematical description of the definition of multicollinearity and its diagnostics, which was not presented in the main text.

### Multicollinearity

If two explanatory variables  $X_1$  and  $X_2$  have a linear relationship, as follows,

$$\begin{aligned} c_1X_1 + c_2X_2 &= c_0 \\ \Leftrightarrow X_1 &= c_0 - \frac{c_2}{c_1}X_2 \\ \Leftrightarrow X_2 &= c_0 - \frac{c_1}{c_2}X_1, \end{aligned}$$

where  $c_0$ ,  $c_1$ , and  $c_2$  are arbitrary constants, the relationship is called exact collinearity. If the relationship between more than two explanatory variables ( $X_1, X_2, \dots, X_k, k > 2, k$  is a natural number) is or approximates

$$c_1X_1 + c_2X_2 + \dots + c_kX_k = c_0,$$

where  $c_k (k > 2, k$  is a natural number) is an arbitrary constant, multicollinearity occurs. Under multicollinearity, more than one explanatory variable  $X_h$  is determined by the other explanatory variables as follows:

$$X_h \cong \left( c_0 - \sum_{j \neq h} c_j X_j \right) / c_h (j = 1, 2, \dots, k) j \neq h$$

### Variance Inflation Factor

A multiple linear regression model with  $n$  sample observations of  $k$  explanatory variables ( $X_1, X_2, \dots, X_k$ ) and a response variable ( $Y$ ) is given by

$$Y_i = \beta_0 + \beta_1X_{i1} + \beta_2X_{i2} + \dots + \beta_kX_{ik} + \varepsilon_i (i = 1, 2, \dots, n) \quad \varepsilon_i \sim N(0, \sigma^2),$$

where  $\beta_j (j = 0, 1, 2, \dots, k)$  and  $\varepsilon_i$  are the regression coefficients and error, respectively. Each error ( $\varepsilon_1, \varepsilon_2, \dots, \varepsilon_n$ ) is stochastically independent and is normally distributed with a mean of 0 and a variance of  $\sigma^2$ . The variance of  $\beta_j [Var(\beta_j)]$  is

$$Var(\beta_j) = \sigma^2 \left( \frac{1}{1 - R_j^2} \right) \left( \frac{1}{\sum_{i=1}^n (X_{ij} - \bar{X}_j)^2} \right)$$

where  $\sum_{i=1}^n (X_{ij} - \bar{X}_j)^2 = (X_{1j} - \bar{X}_j)^2 + (X_{2j} - \bar{X}_j)^2 + \dots + (X_{nj} - \bar{X}_j)^2$  is the sum of squares of the difference between each value of  $X_{ij}$  and the mean of  $X_{ij} (\bar{X}_j)$  and  $R_j^2$  is the coefficient of determination from the regression model [ $X_{ij} = \gamma_0 + \sum_{l=1}^k \gamma_l X_{il} + \epsilon_i (i = 1, 2, \dots, n; l = 1, 2, \dots, k; l \neq j)$ ] with the response variable of  $X_{ij}$ , the explanatory variables of  $X_{il}$ , the regression coefficients of  $\gamma_0$  and  $\gamma_l$ , and the error of  $\epsilon_i$ . Assuming that  $\sum_{i=1}^n (X_{ij} - \bar{X}_j)^2$  and  $\sigma^2$  are constant,  $Var(\beta_j)$  is solely dependent on  $\frac{1}{1 - R_j^2}$  and an increase in  $R_j^2$  leads to an increase in  $Var(\beta_j)$  and vice versa. Because  $0 \leq R_j^2 \leq 1, R_j^2 = 0$  minimizes  $Var(\beta_j)$  while  $R_j^2 \approx 1$  makes  $Var(\beta_j)$  infinite (Fig. 1). This means that the complete absence of multicollinearity ( $R_j^2 = 0$ ) between explanatory variables minimizes the variance of the regression coefficient for an explanatory variable of interest, whereas exact multicollinearity ( $R_j^2 = 1$ ) between them inflates the variance infinitely. Because of its significant effects on the variance of a regression coefficient, the term

$$\frac{1}{1 - R_j^2}$$

is called the variance inflation factor; its reciprocal is known as the tolerance.

The variance inflated by strong multicollinearity increases the standard error of the regression coefficient ( $\sqrt{\text{Var}(\beta_j)}$ ) and widens the 95% confidence interval of a regression coefficient ( $\beta_j$ ), which is

$$\beta_j \pm t_{(n-k-1; 0.025)} \left( \sqrt{\text{Var}(\beta_j)} \right),$$

where  $t_{(n-k-1; 0.025)}$  is the critical t-statistic at 2.5% ( $= \frac{100-95}{2}\%$ ) level under the degree of freedom  $n - k - 1$ . The increase in the variance also results in a reduction in t-statistic

$$T = \frac{\beta_j - 0}{\sqrt{\text{Var}(\beta_j)}}$$

for the hypothesis test ( $H_0: \beta_j = 0$  versus  $H_1: \beta_j \neq 0$ ), which produces an insignificant result.

### Condition Number and Condition Index

Each explanatory variable ( $X_{ij}$ ) from a multiple linear regression  $Y_i = \beta_0 + \beta_1 X_{i1} + \beta_2 X_{i2} + \dots + \beta_k X_{ik} + \varepsilon_i$  ( $i = 1, 2, \dots, n$ ) can be standardized by dividing the difference between each of its values ( $X_{ij}$ ) and their mean ( $\bar{X}_j$ ) by the square root of the sum of squares of all the differences:

$$Z_{ij} = \frac{X_{ij} - \bar{X}_j}{\sqrt{\sum_{i=1}^n (X_{ij} - \bar{X}_j)^2}} \quad (j = 1, 2, \dots, k)$$

Then, we obtain an  $n \times k$  matrix ( $Z$ ) of the standardized explanatory variables:

$$Z = \begin{pmatrix} Z_{11} & Z_{12} & \dots & Z_{1k} \\ Z_{21} & Z_{22} & \dots & Z_{2k} \\ \vdots & \vdots & \ddots & \vdots \\ Z_{n1} & Z_{n2} & \dots & Z_{nk} \end{pmatrix}$$

By transposing  $Z$ , so that the rows become columns and vice versa, we obtain the  $k \times n$  transposed matrix ( $Z^T$ ):

$$Z^T = \begin{pmatrix} Z_{11} & Z_{12} & \dots & Z_{1k} \\ Z_{21} & Z_{22} & \dots & Z_{2k} \\ \vdots & \vdots & \ddots & \vdots \\ Z_{n1} & Z_{n2} & \dots & Z_{nk} \end{pmatrix}$$

The multiplication of  $Z^T$  by  $Z$  produces a  $k \times k$  square matrix. As shown below, the multiplications of each element from the  $a^{th}$  row of  $Z^T$  and the  $b^{th}$  column of  $Z$  yield the element from the  $b^{th}$  column of the  $a^{th}$  row in  $Z^T \times Z$ :

$$Z^T \times Z = \begin{pmatrix} Z_{11} & Z_{12} & \dots & Z_{1k} \\ Z_{21} & Z_{22} & \dots & Z_{2k} \\ \vdots & \vdots & \ddots & \vdots \\ Z_{n1} & Z_{n2} & \dots & Z_{nk} \end{pmatrix} \times \begin{pmatrix} Z_{11} & Z_{12} & \dots & Z_{1k} \\ Z_{21} & Z_{22} & \dots & Z_{2k} \\ \vdots & \vdots & \ddots & \vdots \\ Z_{n1} & Z_{n2} & \dots & Z_{nk} \end{pmatrix}$$

$$= \begin{pmatrix} Z_{11}Z_{11} + Z_{21}Z_{21} + \dots + Z_{n1}Z_{n1} & Z_{11}Z_{12} + Z_{21}Z_{22} + \dots + Z_{n1}Z_{n2} & \dots & Z_{11}Z_{1k} + Z_{21}Z_{2k} + \dots + Z_{n1}Z_{nk} \\ Z_{12}Z_{11} + Z_{22}Z_{21} + \dots + Z_{n2}Z_{n1} & Z_{12}Z_{12} + Z_{22}Z_{22} + \dots + Z_{n2}Z_{n2} & \dots & Z_{12}Z_{1k} + Z_{22}Z_{2k} + \dots + Z_{n2}Z_{nk} \\ \vdots & \vdots & \ddots & \vdots \\ Z_{1k}Z_{11} + Z_{2k}Z_{21} + \dots + Z_{nk}Z_{n1} & Z_{1k}Z_{12} + Z_{2k}Z_{22} + \dots + Z_{nk}Z_{n2} & \dots & Z_{1k}Z_{1k} + Z_{2k}Z_{2k} + \dots + Z_{nk}Z_{nk} \end{pmatrix}$$

Each element of the square matrix is equivalent to a correlation coefficient ( $r$ ) of two explanatory variables ( $X_{ih}$  and  $X_{ij}$ ).

$$Z_{1h}Z_{1j} + Z_{2h}Z_{2j} + \dots + Z_{nh}Z_{nj}$$

$$= \frac{X_{1h} - \bar{X}_h}{\sqrt{\sum_{i=1}^n (X_{ih} - \bar{X}_h)^2}} \frac{X_{1j} - \bar{X}_j}{\sqrt{\sum_{i=1}^n (X_{ij} - \bar{X}_j)^2}} + \frac{X_{2h} - \bar{X}_h}{\sqrt{\sum_{i=1}^n (X_{ih} - \bar{X}_h)^2}} \frac{X_{2j} - \bar{X}_j}{\sqrt{\sum_{i=1}^n (X_{ij} - \bar{X}_j)^2}} + \dots + \frac{X_{nh} - \bar{X}_h}{\sqrt{\sum_{i=1}^n (X_{ih} - \bar{X}_h)^2}} \frac{X_{nj} - \bar{X}_j}{\sqrt{\sum_{i=1}^n (X_{ij} - \bar{X}_j)^2}} = r_{hj}$$

Therefore, the matrix  $Z^T Z$  can be expressed as follows:

$$Z^T Z = \begin{pmatrix} r_{11} & r_{11} & \dots & r_{1k} \\ r_{21} & r_{22} & \dots & r_{2k} \\ \vdots & \vdots & \ddots & \vdots \\ r_{k1} & r_{2k} & \dots & r_{kk} \end{pmatrix}$$

To calculate the eigenvalues of a square matrix, its determinant needs to be known. The determinant of a  $2 \times 2$  matrix is

$$\begin{vmatrix} a & b \\ c & d \end{vmatrix} = ad - bc$$

The determinant of a  $3 \times 3$  matrix is

$$\begin{vmatrix} a & b & c \\ d & e & f \\ g & h & i \end{vmatrix} = a \begin{vmatrix} e & f \\ h & i \end{vmatrix} - b \begin{vmatrix} d & f \\ g & i \end{vmatrix} + c \begin{vmatrix} d & e \\ g & h \end{vmatrix}$$

$$= a(ei - fh) - b(di - fg) + c(dh - eg)$$

Using the above equations for the determinant of a square matrix, the eigenvalues ( $\lambda_1, \lambda_2$ ) of the  $2 \times 2$  correlation matrix can be obtained:

$$\left| \begin{pmatrix} r_{11} & r_{12} \\ r_{21} & r_{22} \end{pmatrix} - \lambda \times \begin{pmatrix} 1 & 0 \\ 0 & 1 \end{pmatrix} \right| = 0$$

$$\begin{vmatrix} r_{11} - \lambda & r_{12} \\ r_{21} & r_{22} - \lambda \end{vmatrix} = 0$$

$$(r_{11} - \lambda)(r_{22} - \lambda) - r_{12}r_{21} = 0$$

$$\lambda^2 - (r_{11} + r_{22})\lambda + r_{11}r_{22} - r_{12}r_{21} = 0$$

$$\lambda = \frac{(r_{11} + r_{22}) \pm \sqrt{(r_{11} + r_{22})^2 - 4(r_{11}r_{22} - r_{12}r_{21})}}{2} \because ax^2 + bx + c = 0 \Leftrightarrow x = \frac{-b \pm \sqrt{b^2 - 4ac}}{2a}$$

If generalized, the eigenvalues  $(\lambda_1, \lambda_2, \dots, \lambda_k)$  of the correlation matrix can be calculated.

$$\begin{pmatrix} r_{11} & r_{12} & \dots & r_{1k} \\ r_{21} & r_{22} & \dots & r_{2k} \\ \vdots & \vdots & \ddots & \vdots \\ r_{k1} & r_{k2} & \dots & r_{kk} \end{pmatrix} - \lambda \times \begin{pmatrix} 1 & 0 & \dots & 0 \\ 0 & 1 & \dots & 0 \\ \vdots & \vdots & \ddots & \vdots \\ 0 & 0 & \dots & 1 \end{pmatrix} = 0$$

$$\begin{vmatrix} r_{11} - \lambda & r_{12} & \dots & r_{1k} \\ r_{21} & r_{22} - \lambda & \dots & r_{2k} \\ \vdots & \vdots & \ddots & \vdots \\ r_{k1} & r_{k2} & \dots & r_{kk} - \lambda \end{vmatrix} = 0$$

$$(r_{11} - \lambda) \begin{vmatrix} r_{22} - \lambda & \dots & r_{2k} \\ \vdots & \ddots & \vdots \\ r_{2k} & \dots & r_{kk} - \lambda \end{vmatrix} + r_{21} \begin{vmatrix} r_{21} & r_{23} & \dots & r_{2k} \\ \vdots & \vdots & \ddots & \vdots \\ r_{k1} & r_{k3} & \dots & r_{kk} - \lambda \end{vmatrix} + \dots + r_{1k} \begin{vmatrix} r_{12} & \dots & r_{2(k-1)} \\ \vdots & \ddots & \vdots \\ r_{1k} & \dots & r_{k(k-1)} \end{vmatrix} = 0$$

$$(\lambda - \lambda_1)(\lambda - \lambda_2) \dots (\lambda - \lambda_k) = 0$$

By solving the  $k^{th}$  degree polynomial equation of the variable  $\lambda$ , we can obtain  $k$  eigenvalues  $(\lambda_1, \lambda_2, \dots, \lambda_k)$ . The number of eigenvalues  $(\lambda_1, \lambda_2, \dots, \lambda_k)$  from the  $k \times k$  matrix is  $k$  and their mean and total sum are 1 and  $k$ , respectively.

The square root of the ratio between the maximum and each eigenvalue  $(\lambda_1, \lambda_2, \dots, \lambda_k)$  is termed “condition index” and is expressed as

$$\kappa_s = \sqrt{\frac{\lambda_{max}}{\lambda_s}} \quad (s = 1, 2, \dots, k)$$

The largest condition index is called the “condition number.”

### Variance Decomposition Proportion

Eigenvectors are calculated from their corresponding eigenvalues. The relationship between two eigenvalues  $(\lambda_1, \lambda_2)$  and their eigenvectors  $(v_1, v_2)$  is as follows:

$$\left[ \begin{pmatrix} r_{11} & r_{12} \\ r_{21} & r_{22} \end{pmatrix} - \lambda_s \times \begin{pmatrix} 1 & 0 \\ 0 & 1 \end{pmatrix} \right] \times \begin{pmatrix} v_{1s} \\ v_{2s} \end{pmatrix} = \begin{pmatrix} 0 \\ 0 \end{pmatrix} \quad (s = 1, 2)$$

By solving the above equation, the ratio ( $R_s$ ) between the two elements ( $v_{1s} = R_s \times v_{2s}$ ) is obtained. As long as the ratio is maintained, the values of the two elements can be chosen arbitrarily. Then, two eigenvectors can be obtained.

$$v_1 = \begin{pmatrix} v_{11} \\ v_{21} \end{pmatrix}, v_2 = \begin{pmatrix} v_{12} \\ v_{22} \end{pmatrix}$$

With

$$\left[ \begin{pmatrix} r_{11} & r_{12} & \dots & r_{1k} \\ r_{21} & r_{22} & \dots & r_{2k} \\ \vdots & \vdots & \ddots & \vdots \\ r_{k1} & r_{k2} & \dots & r_{kk} \end{pmatrix} - \lambda_s \times \begin{pmatrix} 1 & 0 & \dots & 0 \\ 0 & 1 & \dots & 0 \\ \vdots & \vdots & \ddots & \vdots \\ 0 & 0 & \dots & 1 \end{pmatrix} \right] \times \begin{pmatrix} v_{1s} \\ v_{2s} \\ \vdots \\ v_{ks} \end{pmatrix} = \begin{pmatrix} 0 \\ 0 \\ \vdots \\ 0 \end{pmatrix}$$

we have  $k$  eigenvectors  $(v_1, v_2, \dots, v_k)$  consisting of  $k$  elements in one column, which correspond to  $k$  eigenvalues  $(\lambda_1, \lambda_2, \dots, \lambda_k)$ .

The eigenvector corresponding to the eigenvalue  $\lambda_s$  ( $s = 1, 2, \dots, k$ ) are expressed as

$$\mathbf{v}_s = \begin{pmatrix} v_{1s} \\ v_{2s} \\ \vdots \\ v_{ks} \end{pmatrix}$$

There are  $k$  variance decomposition proportions for the regression coefficient  $\beta_j$  ( $j = 1, 2, \dots, k$ ), which are defined as

$$\pi_{js} = \frac{\frac{v_{js}^2}{\lambda_s}}{\frac{v_{j1}^2}{\lambda_1} + \frac{v_{j2}^2}{\lambda_2} + \dots + \frac{v_{jk}^2}{\lambda_k}} = \frac{\frac{v_{js}^2}{\lambda_s}}{\sum_{s=1}^k \frac{v_{js}^2}{\lambda_s}} \quad (s = 1, 2, \dots, k)$$

The total sum of the variance decomposition proportions for  $\beta_j$  ( $\pi_{j1} + \pi_{j2} + \dots + \pi_{jk} = \sum_{s=1}^k \pi_{js}$ ) is 1.
